# Supplementary material for: The Interplay of Conjugation and Metal Coordination in Tuning the Electron Transfer Abilities of NTA-Graphene Based Interfaces
Source: MDPI journal article supplement (doi:10.3390/ijms23010543), 2022-01-04
Supplement: s1 [file s1]

## **Supporting Information for**

### **The interplay of conjugation and metal coordination in tuning the electron transfer abilities of NTA-graphene based interfaces**

M. Kaźmierczak, B. Trzaskowski, S. Osella\*

Chemical and Biological Systems Simulation Lab, Centre of New Technologies, University of Warsaw, Banacha 2C, 02-097 Warsaw, Poland.

**Table S1.** Cut-off values for single point calculations

|              | Ni <sup>2+</sup> | Co <sup>2+</sup> | Cu <sup>2+</sup> | No metal |
|--------------|------------------|------------------|------------------|----------|
| Ecutwfc [Ry] | 90               | 65               | 50               | 50       |
| Ecutrho [Ry] | 480              | 455              | 380              | 200      |

**Table S2.** Parameters of the studied systems

|                                           | Ni         |       |       |       | Co    |       |       |       | Cu    |       |       |       |
|-------------------------------------------|------------|-------|-------|-------|-------|-------|-------|-------|-------|-------|-------|-------|
|                                           | 1DB        |       | 2DB   |       | 1DB   |       | 2DB   |       | 1DB   |       | 2DB   |       |
|                                           | MS         | DS    | MS    | DS    | MS    | DS    | MS    | DS    | MS    | DS    | MS    | DS    |
| System dipole (Debye)                     | 1.01       | 1.89  | 0.54  | 2.08  | 3.34  | 2.75  | 3.04  | 2.75  | 0.45  | 1.62  | 0.24  | 1.58  |
| SAM dipole (Debye)                        | 0.38       | 6.32  | 0.29  | 6.17  | 3.97  | 6.31  | 3.88  | 6.25  | 3.47  | 6.25  | 3.32  | 5.86  |
| Depolarization [%]                        | 95         | 41    | 80    | 66    | 51    | 50    | 52    | 64    | 60    | 28    | 58    | 65    |
| Depolarization 2 (if applicable) [%]      | -          | 28    | -     | -24   | -     | 36    | -     | 20    | -     | 56    | -     | 24    |
| Fermi level [eV]                          | -2.70      | -2.12 | -2.80 | -2.14 | -2.08 | -1.76 | -2.13 | -1.81 | -2.59 | -2.19 | -2.61 | -2.31 |
| Band gap [meV]                            | 520        | 690   | 840   | 770   | 1050  | 1360  | 980   | 1460  | 1420  | 300   | 1350  | 350   |
| E <sub>ads</sub> [eV]                     | -2.23      | -4.61 | -2.17 | -4.68 | -2.48 | -5.32 | -2.46 | -5.42 | -2.45 | -4.65 | -2.45 | -4.69 |
| WF [eV]                                   | 4.38       | 4.48  | 4.40  | 4.50  | 4.19  | 4.63  | 4.19  | 4.74  | 4.17  | 4.47  | 4.14  | 4.51  |
| WF shift [meV]                            | -290       | -540  | -160  | -590  | -950  | -780  | -870  | -780  | -130  | -460  | -70   | -450  |
| DV [eV]                                   | -110       | -1800 | -80   | -1760 | -1130 | -1800 | -1110 | -1780 | -990  | -1780 | -950  | -1670 |
| BD [eV]                                   | -180       | 1260  | -70   | 1170  | 180   | 1020  | 240   | 1000  | 860   | 1320  | 880   | 1220  |
| Charge transfer [ e ]                     | 0.02       | 0.01  | 0.03  | 0.05  | 0.03  | 0.01  | 0.03  | 0.05  | 0.02  | 0.01  | 0.03  | 0.04  |
| HOMO energy [eV]                          | -2.81      | -2.27 | -3.06 | -2.30 | -2.49 | -2.07 | -2.54 | -2.16 | -2.99 | -2.34 | -3.03 | -2.45 |
| SOMO energy or energy of second HOMO [eV] | -2.78      | -     | -2.88 | -     | -     | -     | -     | -     | -2.98 | -2.34 | -2.98 | -2.45 |
| LUMO energy [eV]                          | -2.26      | -1.58 | -2.04 | -1.53 | -1.44 | -0.71 | -1.56 | -0.70 | -1.56 | -2.04 | -1.63 | -2.10 |
| CT direction                              | SLG -> SAM |       |       |       |       |       |       |       | -     |       |       |       |

### 1. Tilt angles for PNTA-1DB and PNTA-2DB

The tilt angle was calculated between the plane perpendicular to SLG and the metal centre.

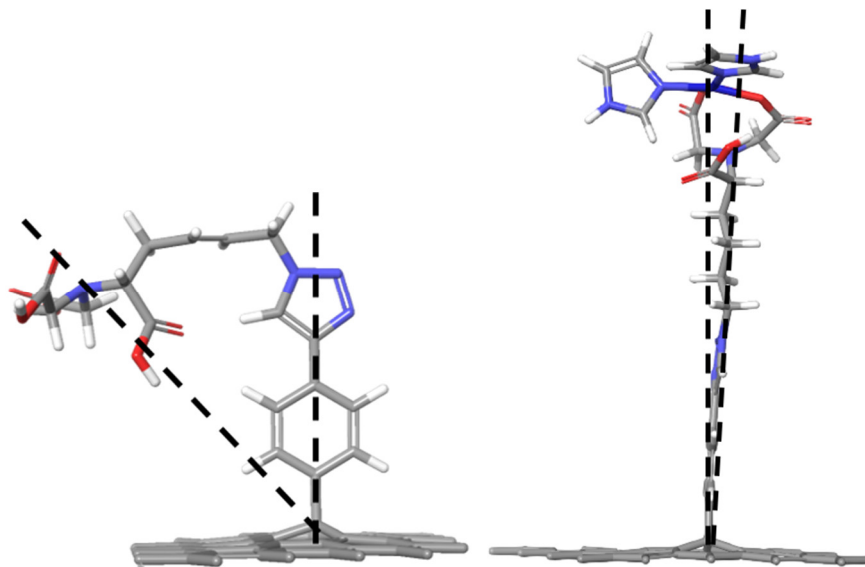

**Figure S1.** Schematic representation of the tilt angle calculation for PNTA-1DB and PNTA-2DB interfaces, respectively.

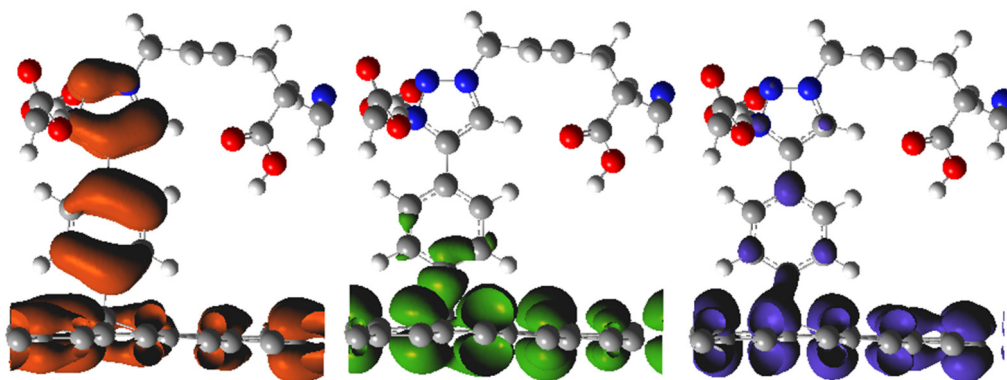

**Figure S2.** Frontier orbital analysis for the PNTA-1DB interface. Red colour refers to the HOCO, green to SOCO and blue to LUCO, respectively.

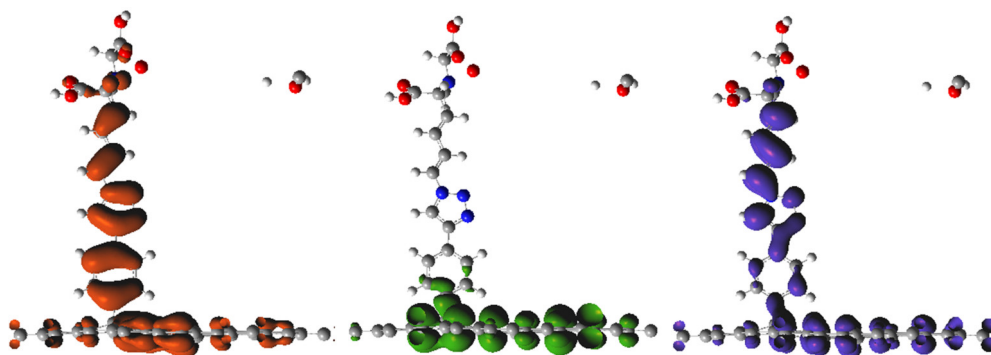

**Figure S3.** Frontier orbital analysis for the PNTA-2DB interface. Red colour refers to the HOCO, green to SOCO and blue to LUCO, respectively.

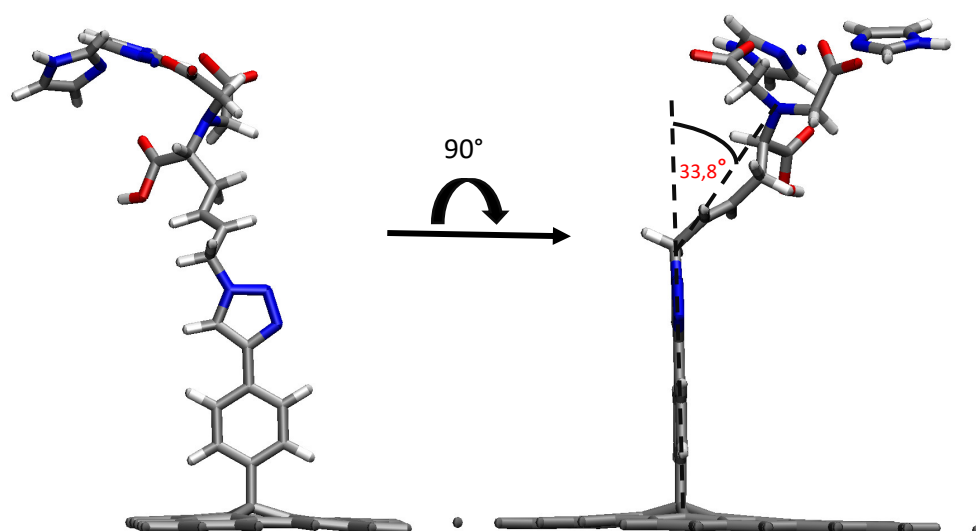

**Figure S4.** Schematic representation of the tilt angle for the X-1DB interfaces.

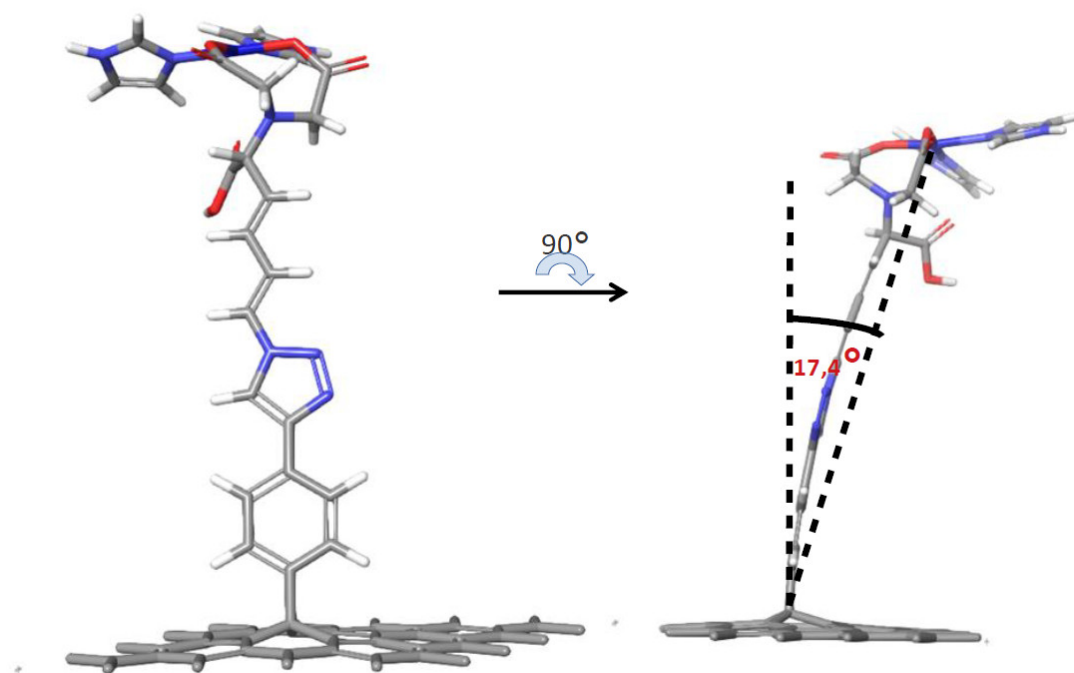

**Figure S5.** Schematic representation of the tilt angle for the X-2DB interfaces.

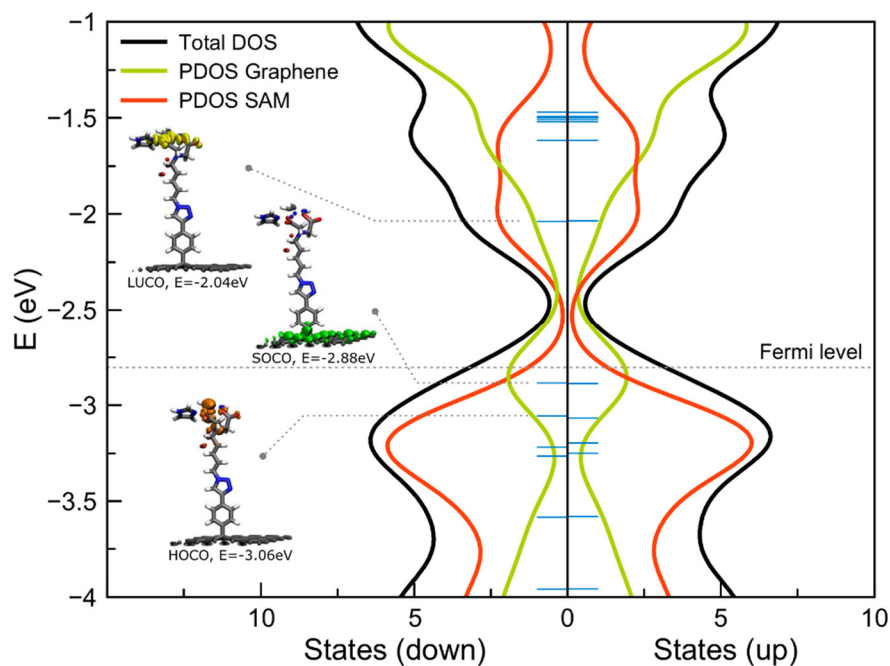

**Figure S6.** Total DOS projected over onto corresponding fragments for the Ni-2DB interface. Eigenvalues are marked with horizontal blue lines and the Fermi level is indicated by a dotted gray line. HOCO (orange), SOCO (green) and LUCO (yellow) are marked and connected to corresponding eigenvalues.

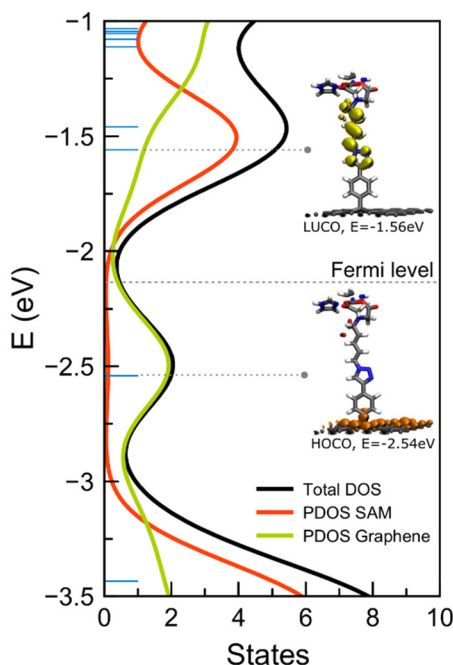

**Figure S7.** Total DOS projected over onto corresponding fragments for the Co-2DB interface. Eigenvalues are marked with vertical blue lines and the Fermi level is indicated by a dotted black line. HOCO (orange) and LUCO (yellow) are marked and connected to corresponding eigenvalues.

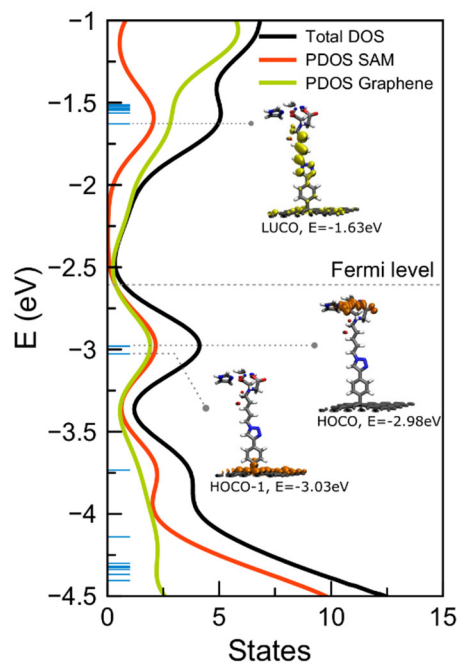

**Figure S8.** Total DOS projected over onto corresponding fragments for the Cu-2DB interface. Eigenvalues are marked with horizontal blue lines and the Fermi level is indicated by a dotted gray line. HOCO (orange) and LUCO (yellow) are marked and connected to corresponding eigenvalues.

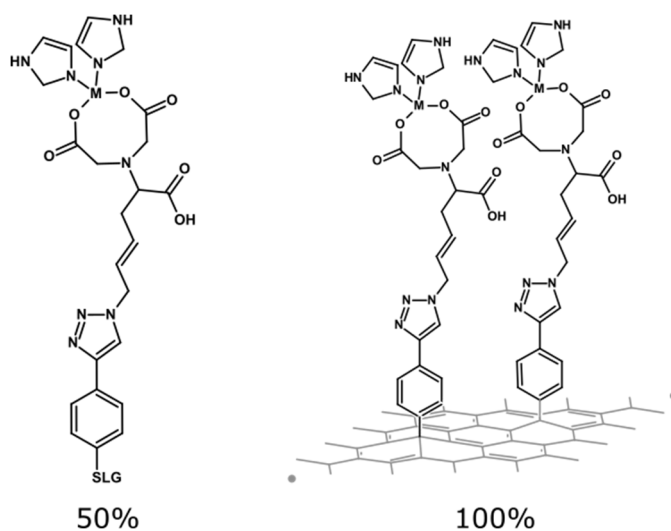

**Figure S9.** Schematic representation of half (left) and fully (right) coverage interfaces.

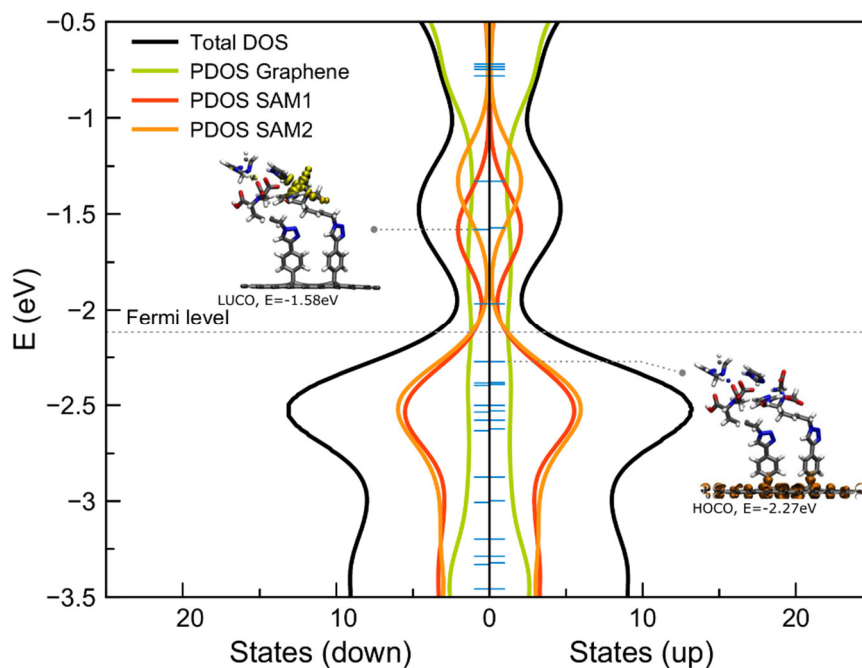

**Figure S10.** Total DOS projected over onto corresponding fragments for the (Ni-1DB)<sub>2</sub> interface. Eigenvalues are marked with horizontal blue lines and the Fermi level is indicated by a dotted gray line. HOCO (orange) and LUCO (yellow) are marked and connected to corresponding eigenvalues.

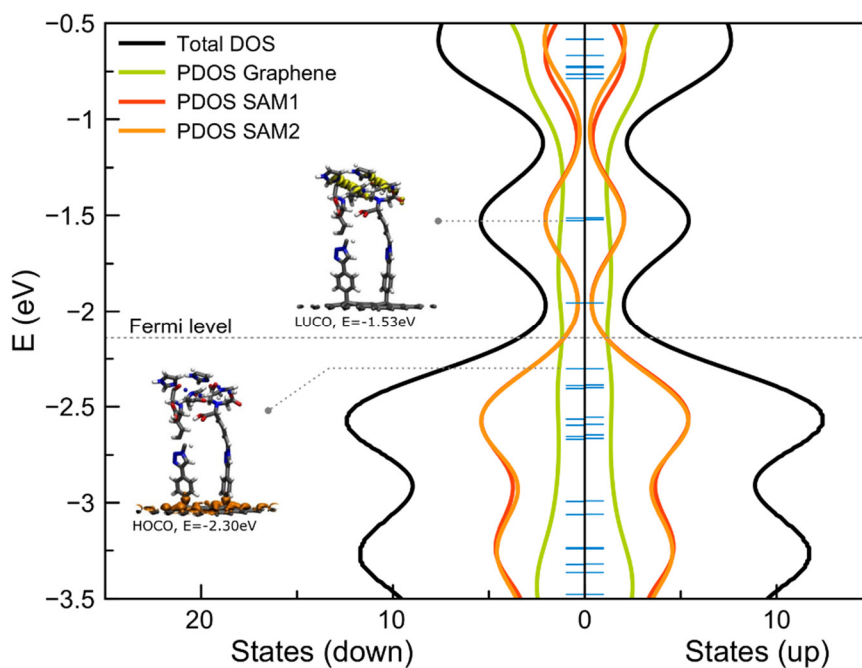

**Figure S11.** Total DOS projected over onto corresponding fragments for the (Ni-2DB)<sub>2</sub> interface. Eigenvalues are marked with horizontal blue lines and the Fermi level is indicated by a dotted gray line. HOCO (orange) and LUCO (yellow) are marked and connected to corresponding eigenvalues.

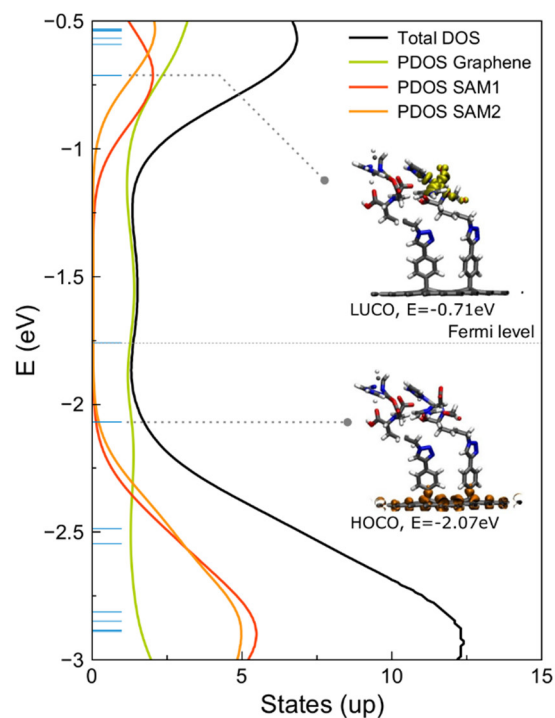

**Figure S12.** Total DOS projected over onto corresponding fragments for the (Co-1DB)<sub>2</sub> interface. Eigenvalues are marked with vertical blue lines and the Fermi level is indicated by a dotted black line. HOCO (orange) and LUCO (yellow) are marked and connected to corresponding eigenvalues.

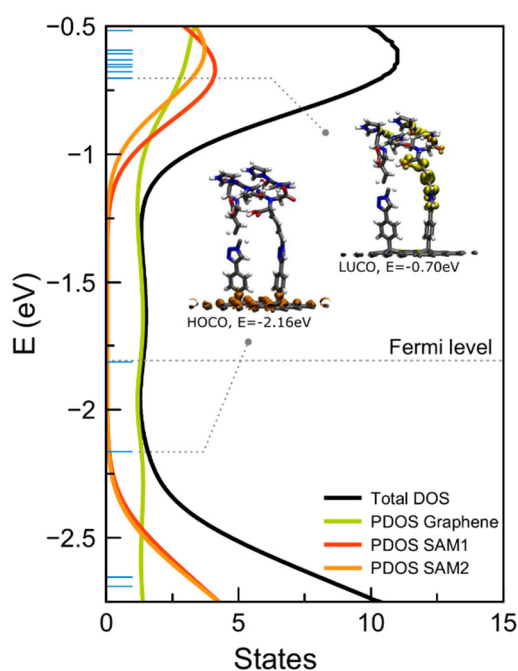

**Figure S13.** Total DOS projected over onto corresponding fragments for the (Co-2DB)<sub>2</sub> interface. Eigenvalues are marked with horizontal blue lines and the Fermi level is indicated by a dotted black line. HOCO (orange) and LUCO (yellow) are marked and connected to corresponding eigenvalues.

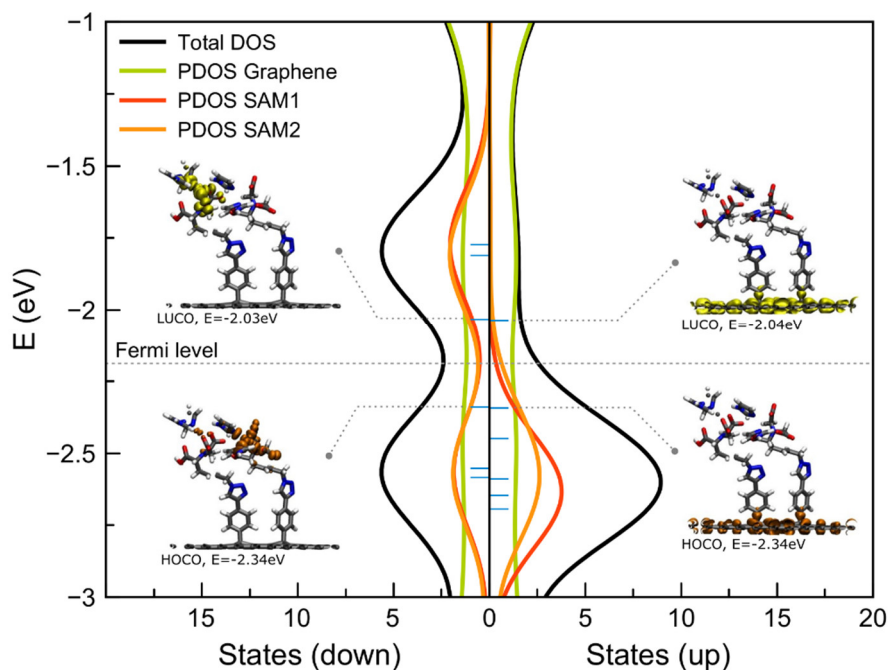

**Figure S14.** Total DOS projected over onto corresponding fragments for the (Cu-1DB)<sub>2</sub> interface. Eigenvalues are marked with horizontal blue lines and the Fermi level is indicated by a dotted gray line. HOCO (orange) and LUCO (yellow) are marked and connected to corresponding eigenvalues.

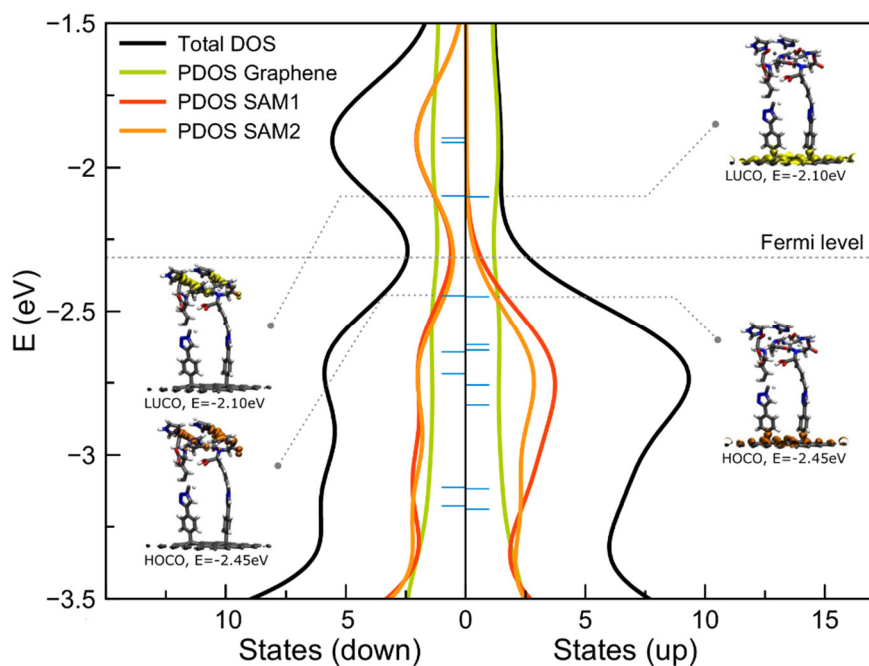

**Figure S15.** Total DOS projected over onto corresponding fragments for the (Cu-2DB)<sub>2</sub> interface. Eigenvalues are marked with horizontal blue lines and the Fermi level is indicated by a dotted gray line. HOCO (orange) and LUCO (yellow) are marked and connected to corresponding eigenvalues.
